# Supplementary material
Source: publisher figshare collection journal article supplement (https://acs.figshare.com/ndownloader/files/4380664)
Supplement: Supplementary file 1 [file 4380664]

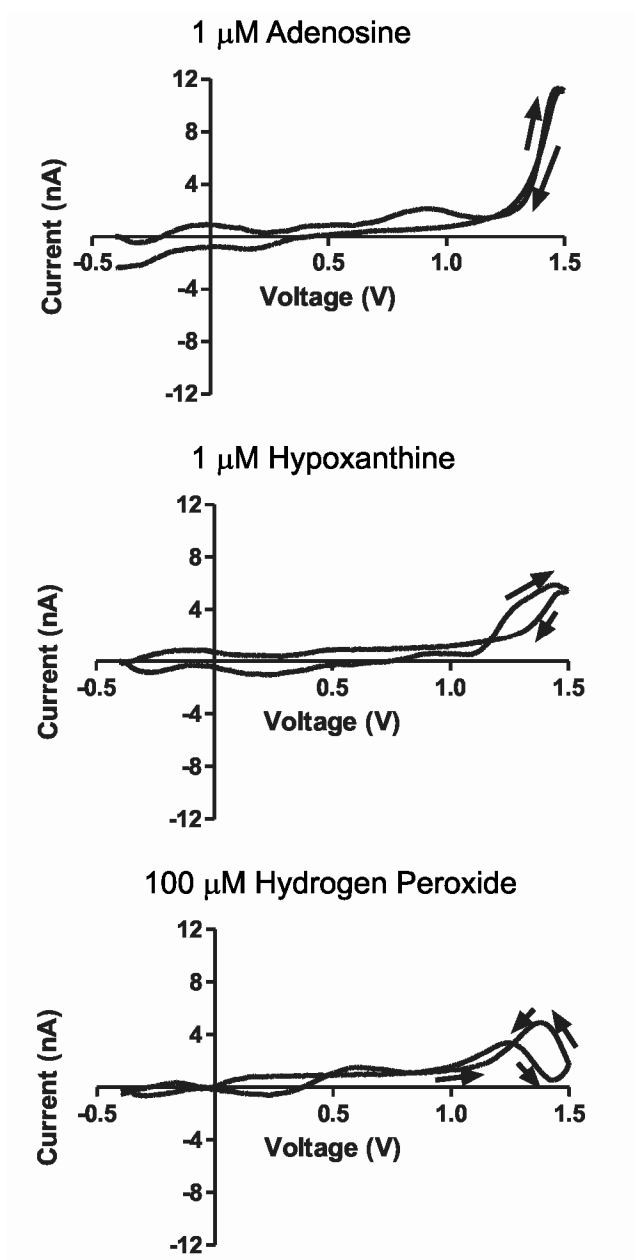

**Supplemental Figure 1:** Calibration current-voltage plots for 1  $\mu$ M adenosine, 1  $\mu$ M hypoxanthine and 100  $\mu$ M hydrogen peroxide ( $\text{H}_2\text{O}_2$ ). Our carbon-fiber microelectrodes are at over two-fold more sensitive for adenosine as hypoxanthine and over 200 times more sensitive than hydrogen peroxide. Approximate limits of detection: Adenosine, 20 nM; hypoxanthine, 60 nM; hydrogen peroxide, 6  $\mu$ M.

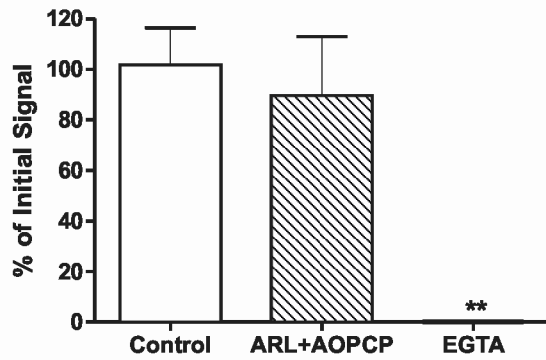

**Supplemental Figure 2:** Effect of a combination of 50  $\mu\text{M}$  ARL-67156 and 100  $\mu\text{M}$  AOPCP, or 1 mM EGTA on adenosine release. Stimulations were 5 pulses at 60 Hz. Effects are plotted as a percentage of the predrug response. A combination of ARL-67156 and AOPCP ( $n = 4$ ) had no significant effect on the adenosine signal. This data is similar to administering only ARL-67156. Adding 1 mM EGTA to preferentially chelate  $\text{Ca}^{2+}$  completely attenuated adenosine release ( $n = 4$ ); the concentration of adenosine after the addition of EGTA was significantly different from the signal before EGTA ( $p < 0.01$ ). This data is similar to EDTA data. Paired t-tests were used to determine the significance of changes.
